# Supplementary material for: Detecting the Minimum Limit on Wheat Stripe Rust in the Latent Period Using Proximal Remote Sensing Coupled with Duplex Real-Time PCR and Machine Learning
Source: MDPI journal article supplement (doi:10.3390/plants12152814), 2023-07-29
Supplement: s1 [file s1]

**Minimum detection limit (MDL) of six hyperspectral features on four modeling ratios on the 24 testing sets.**

1. Analysis of the MDLs for different modeling ratios under the original spectral value (R).

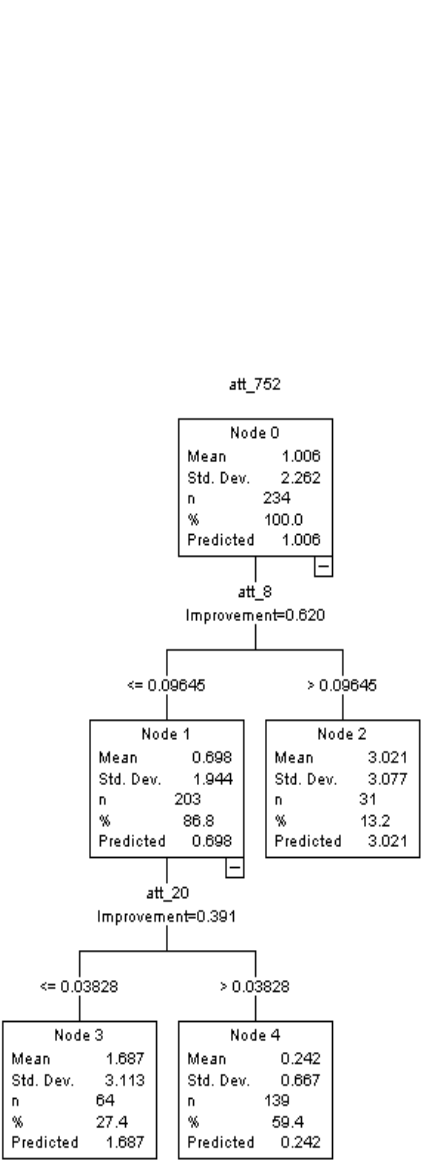

Fig 1-1 The decision tree analysis in modeling 1:1

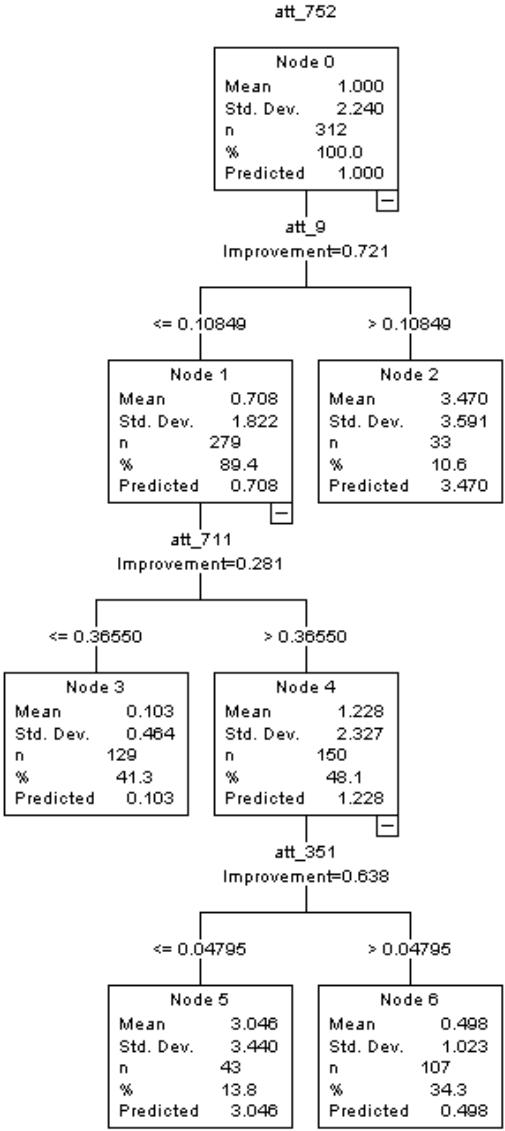

Fig 1-2 The decision tree analysis in modeling 2:1

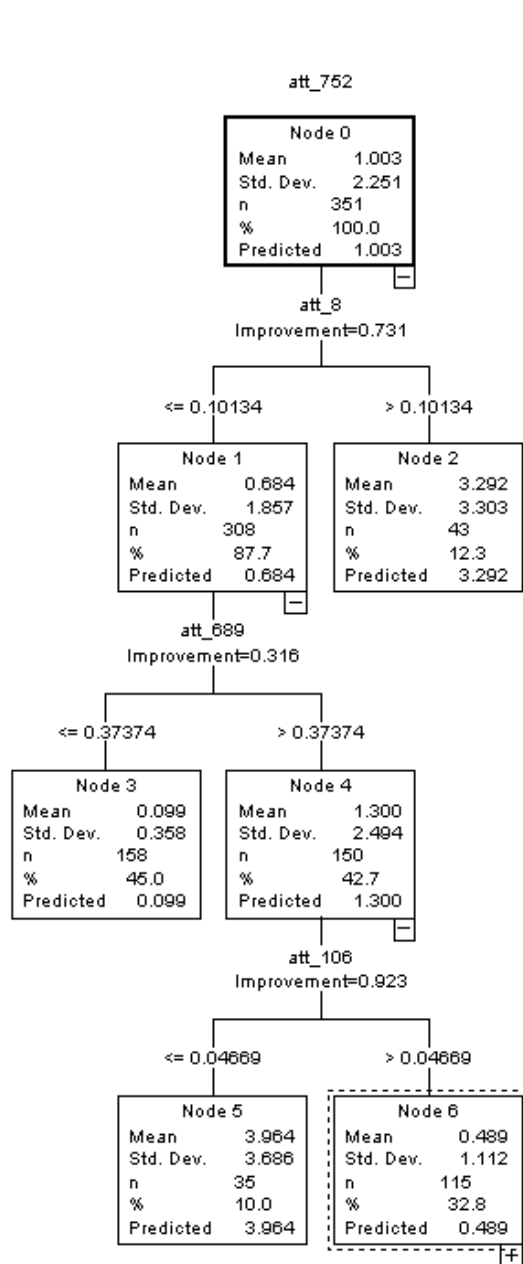

Fig 1-3 The decision tree analysis in modeling 3:1

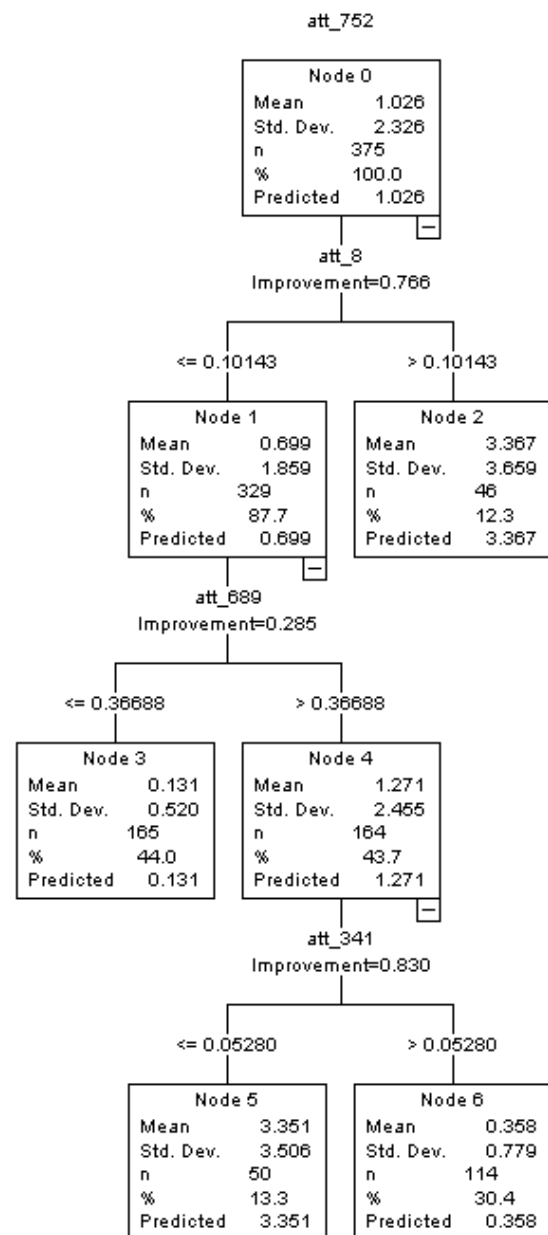

Fig 1-4 The decision tree analysis in modeling 4:1

2. Analysis of the MDL for different modeling ratios under the R\_1st.dv.

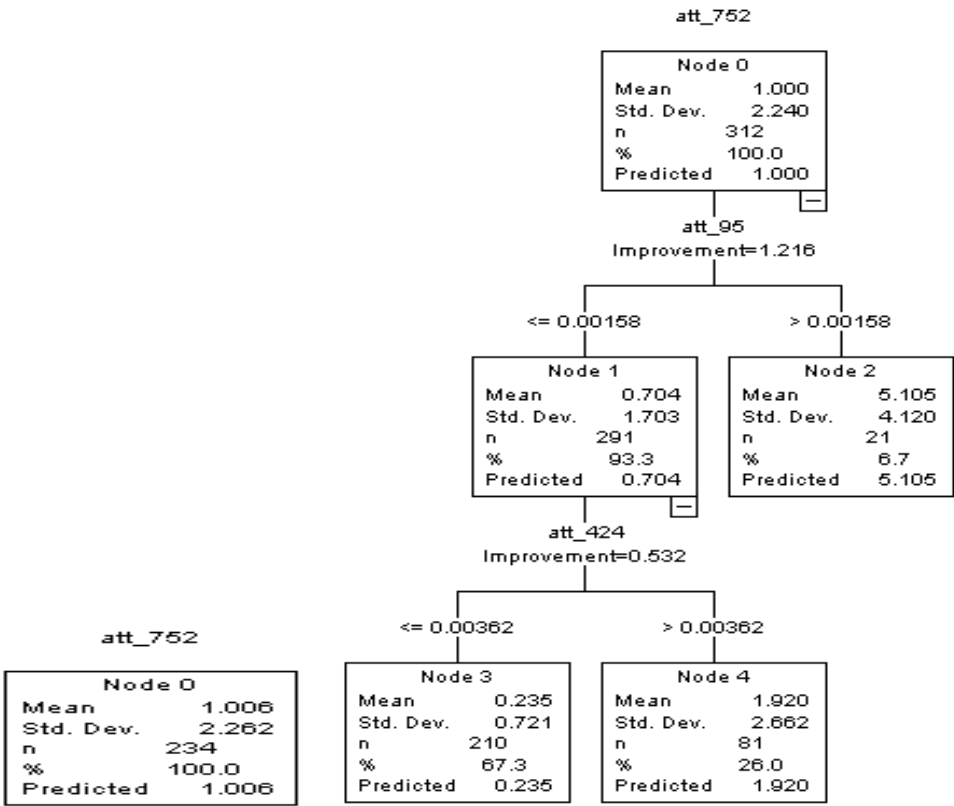

Fig 2-1 The decision tree analysis in modeling 1:1

Fig 2-2 The decision tree analysis in modeling 2:1

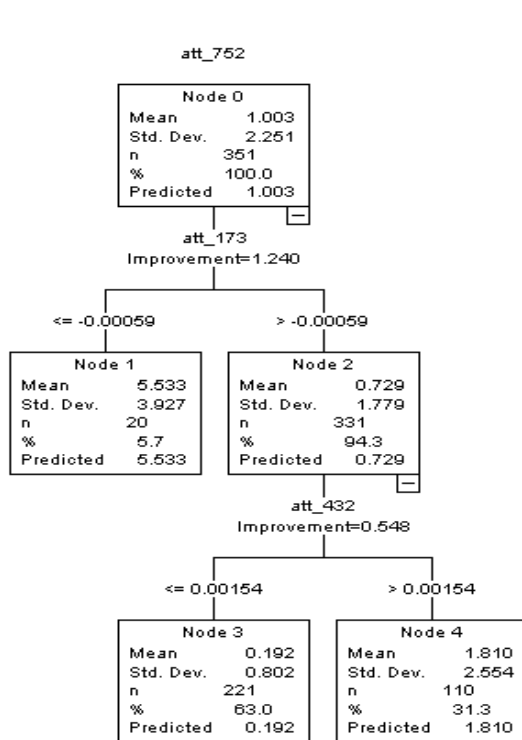

Fig 2-3 The decision tree analysis in modeling 3:1

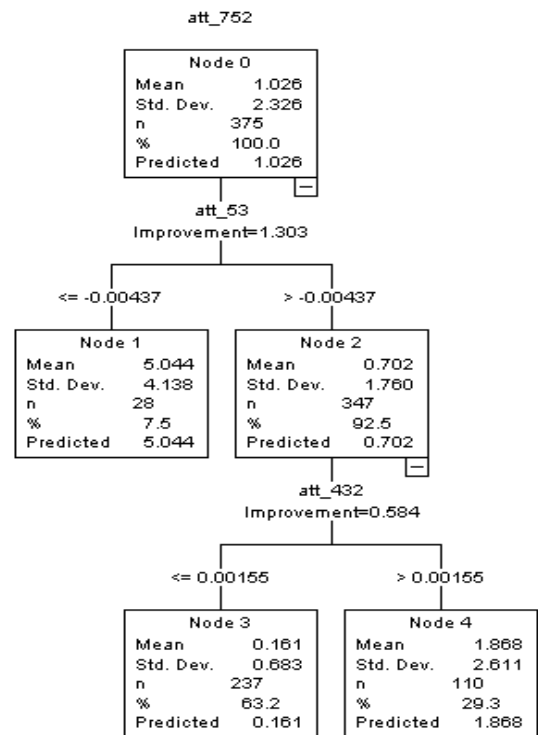

Fig 2-4 The decision tree analysis in modeling 4:1

### 3. Analysis of the MDL for different modeling ratios under the R\_2nd.dv.

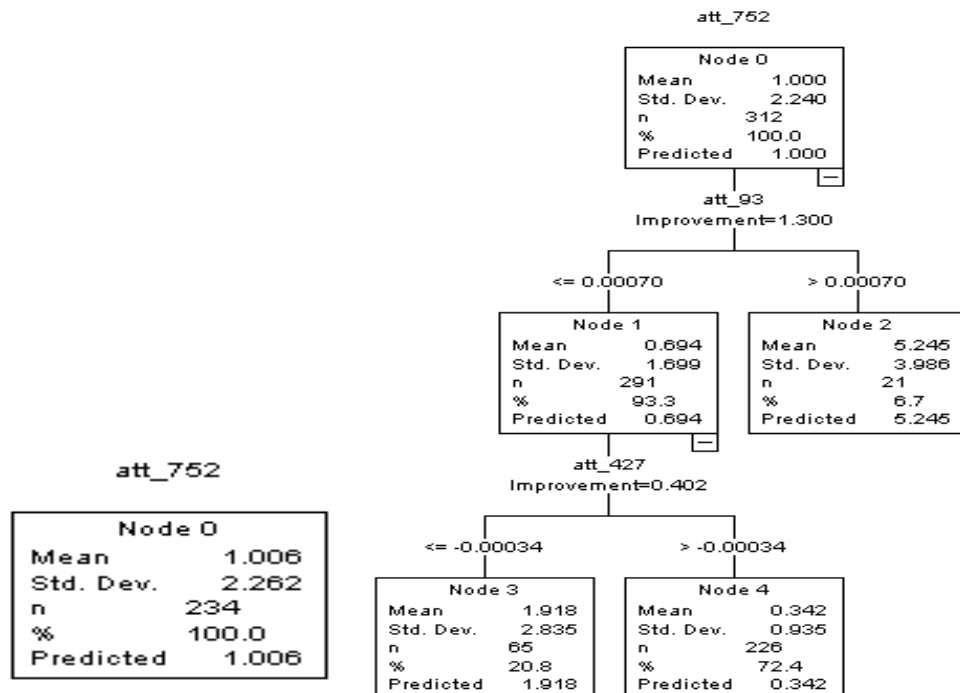

Fig 3-1 The decision tree analysis in modeling 1:1

Fig 3-2 The decision tree analysis in modeling 2:1

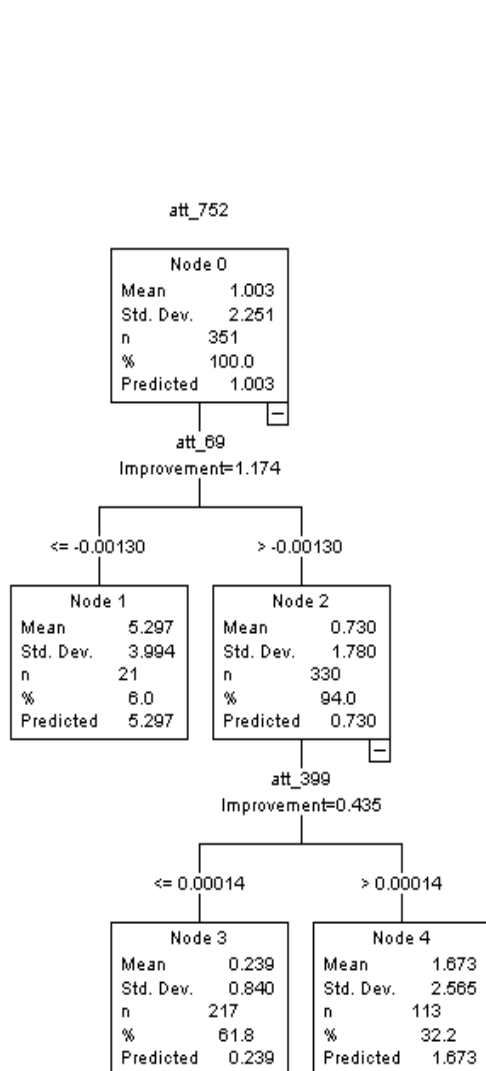

Fig 3-3 The decision tree analysis in modeling 3:1

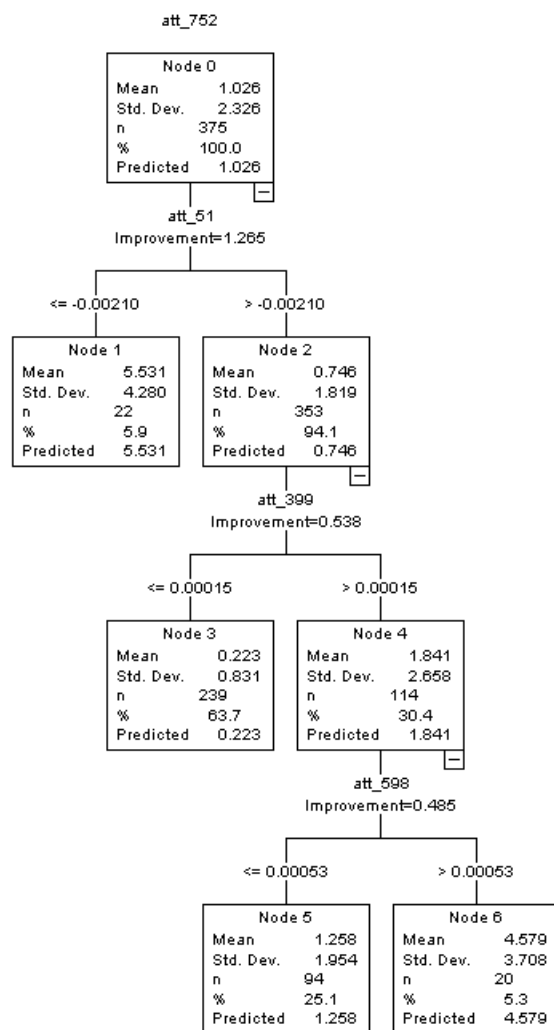

Fig 3-4 The decision tree analysis in modeling 4:1

#### 4. Analysis of the MDL for different modeling ratios under the $\lg(1/R)$ .

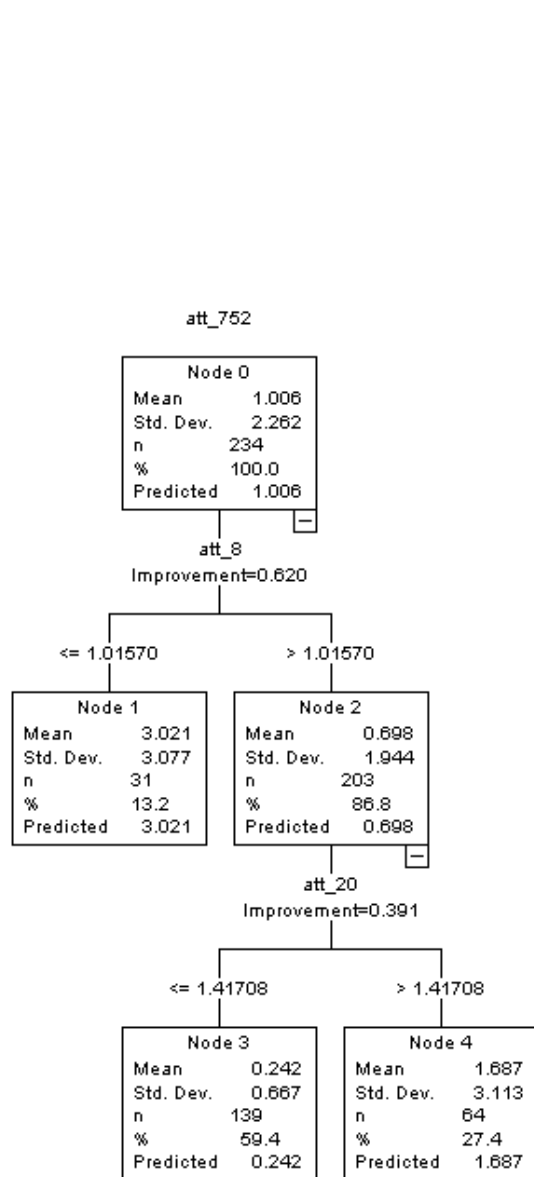

Fig 4-1 The decision tree analysis in modeling 1:1

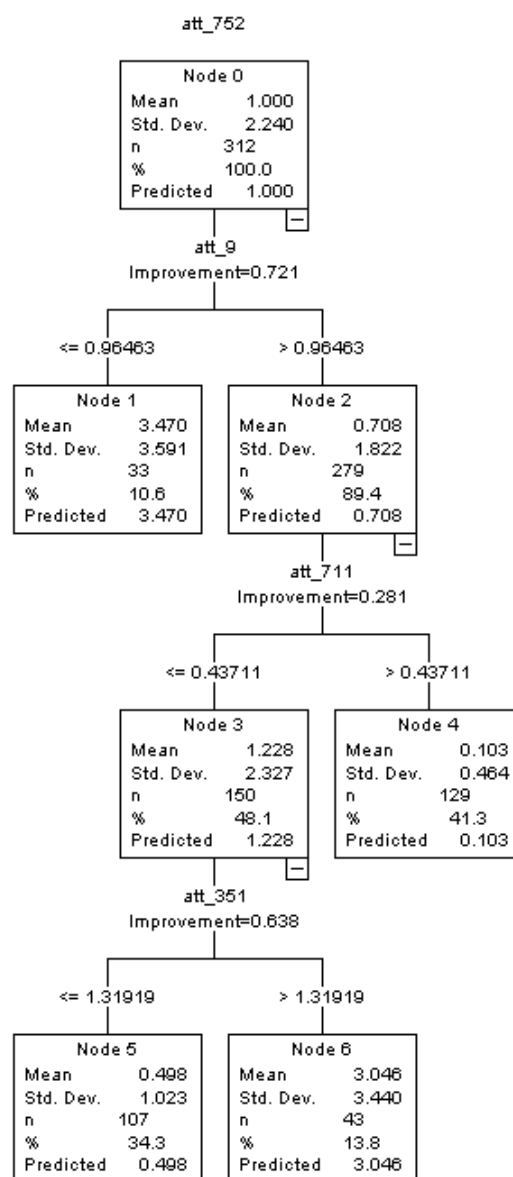

Fig 4-2 The decision tree analysis in modeling 2:1

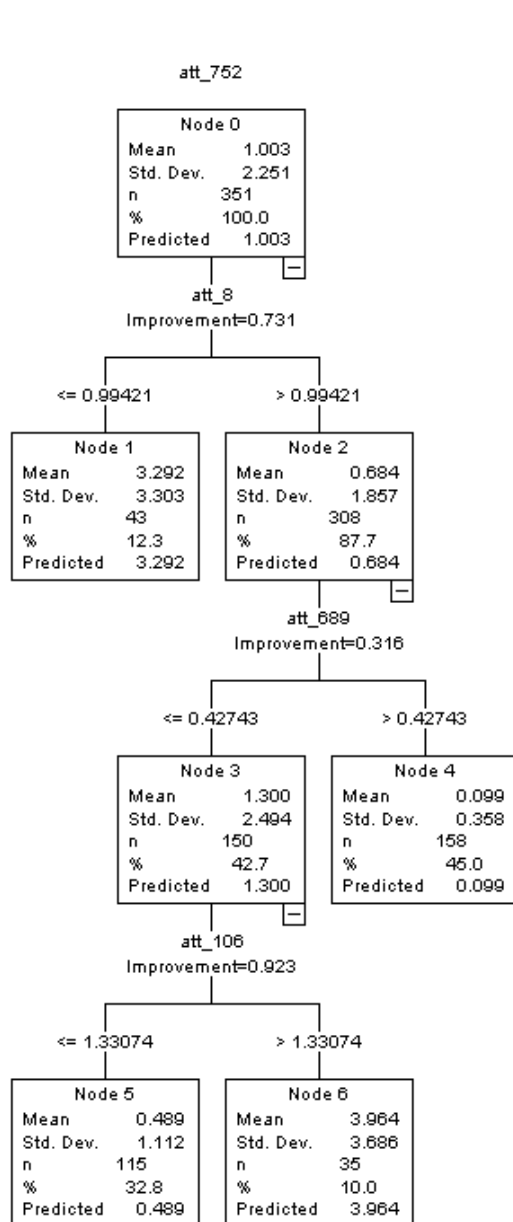

Fig 4-3 The decision tree analysis in modeling 3:1

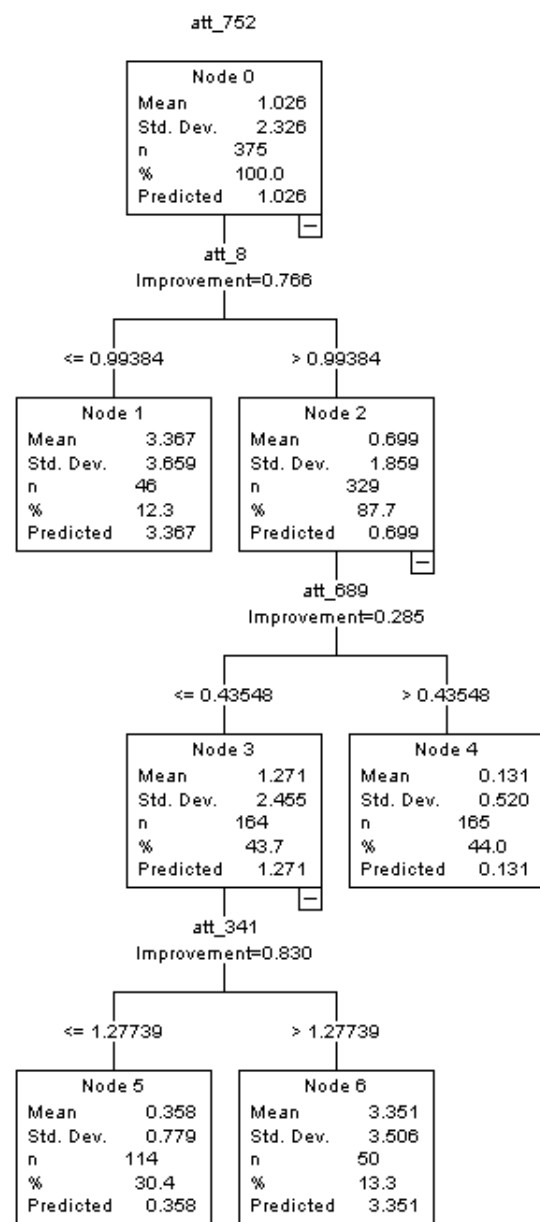

Fig 4-4 The decision tree analysis in modeling 4:1

5. Analysis of the MDL for different modeling ratios under the lg(1/R)\_1st.dv]:

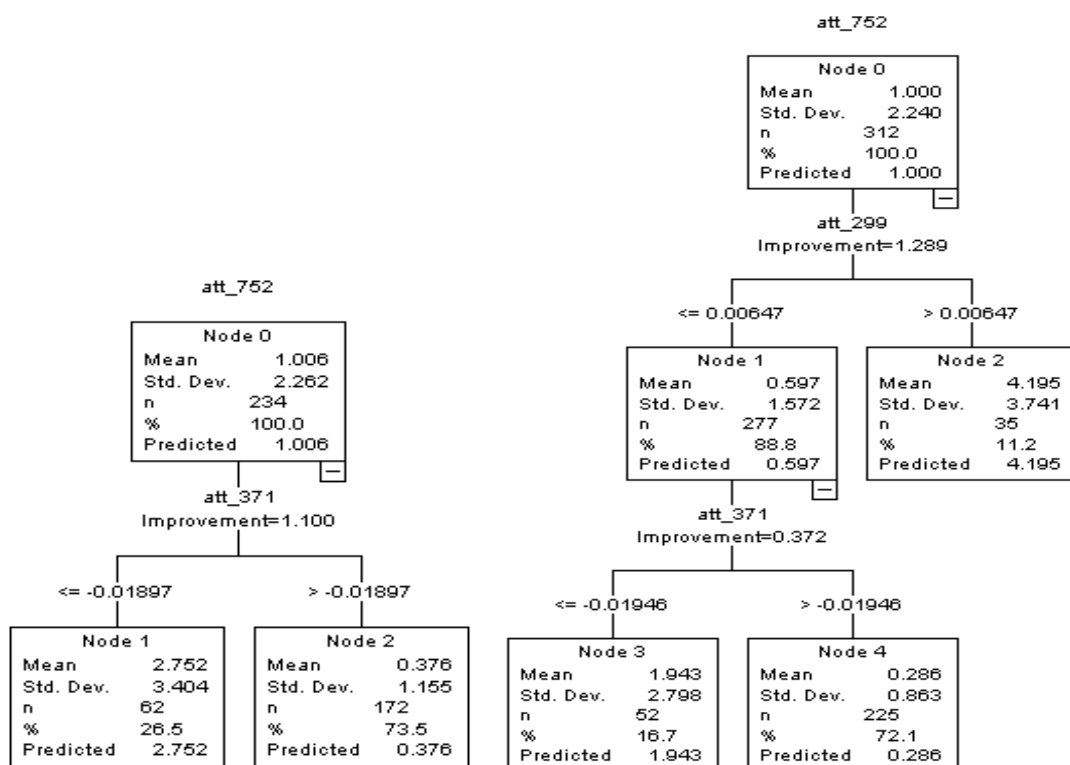

Fig 5-1 The decision tree analysis in modeling 1:1

Fig 5-2 The decision tree analysis in modeling 2:1

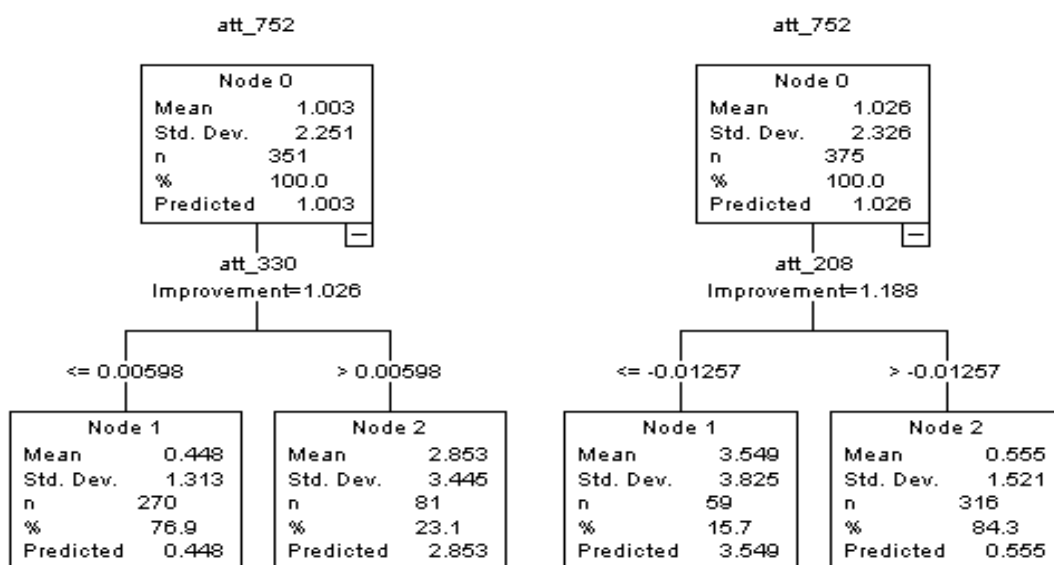

Fig 5-3 The decision tree analysis in modeling 3:1

Fig 5-4 The decision tree analysis in modeling 4:1



6. Analysis of the MDL for different modeling ratios under the lg(1/R)\_2nd.dv:

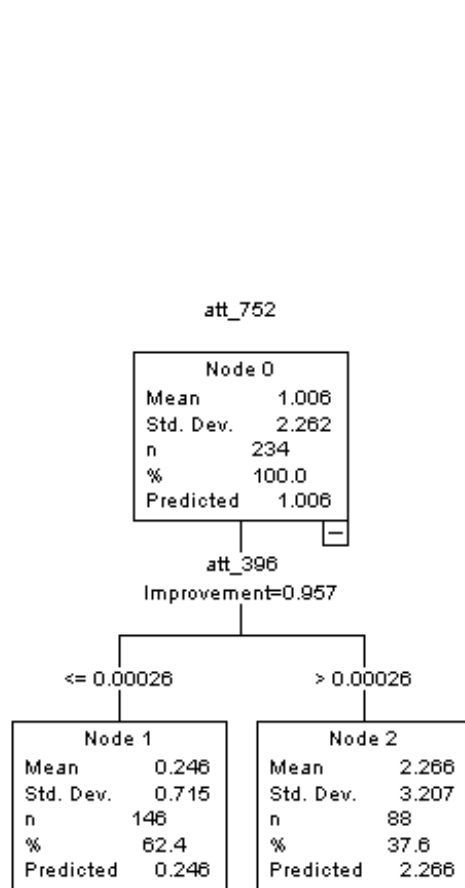

Fig 6-1 The decision tree analysis in modeling 1:1

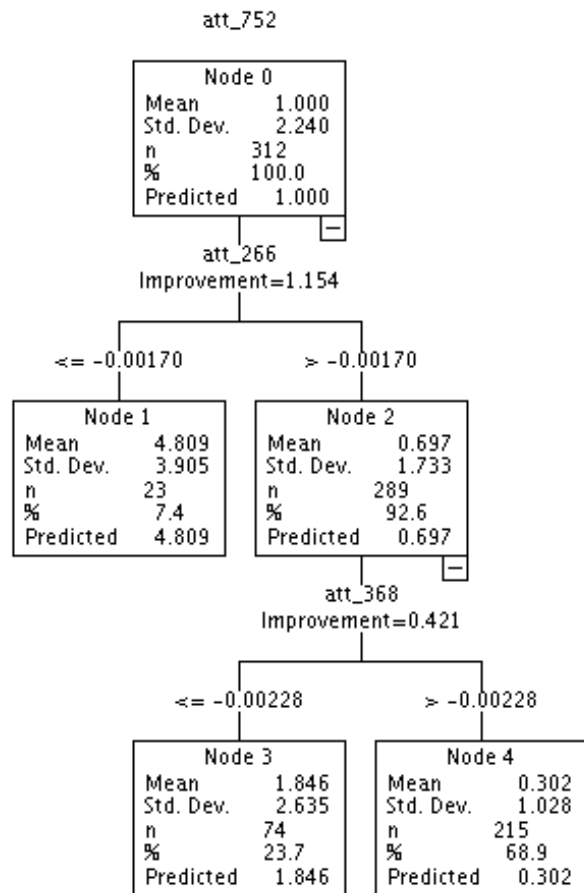

Fig 6-2 The decision tree analysis in modeling 2:1

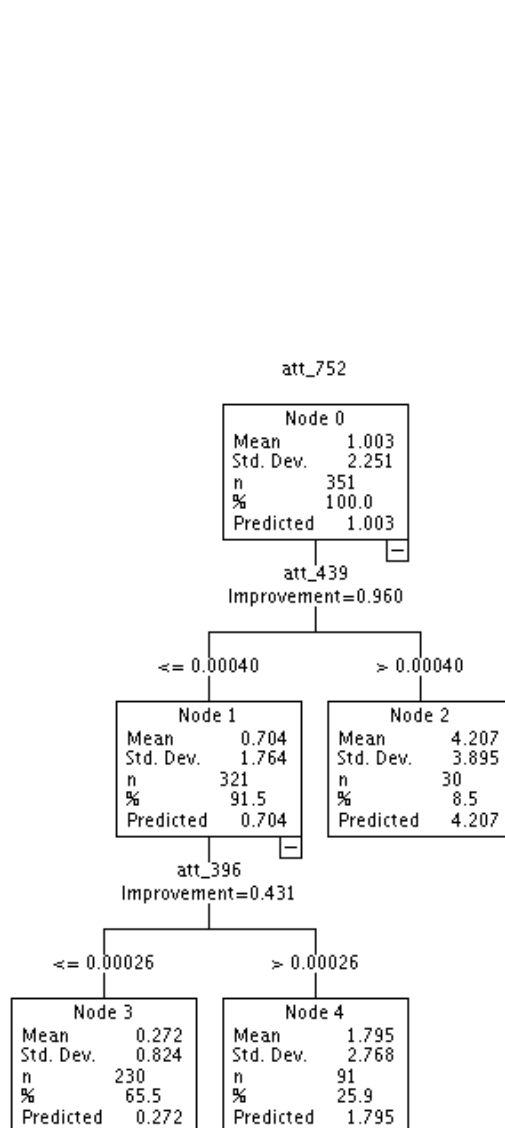

Fig 6-3 The decision tree analysis in modeling 3:1

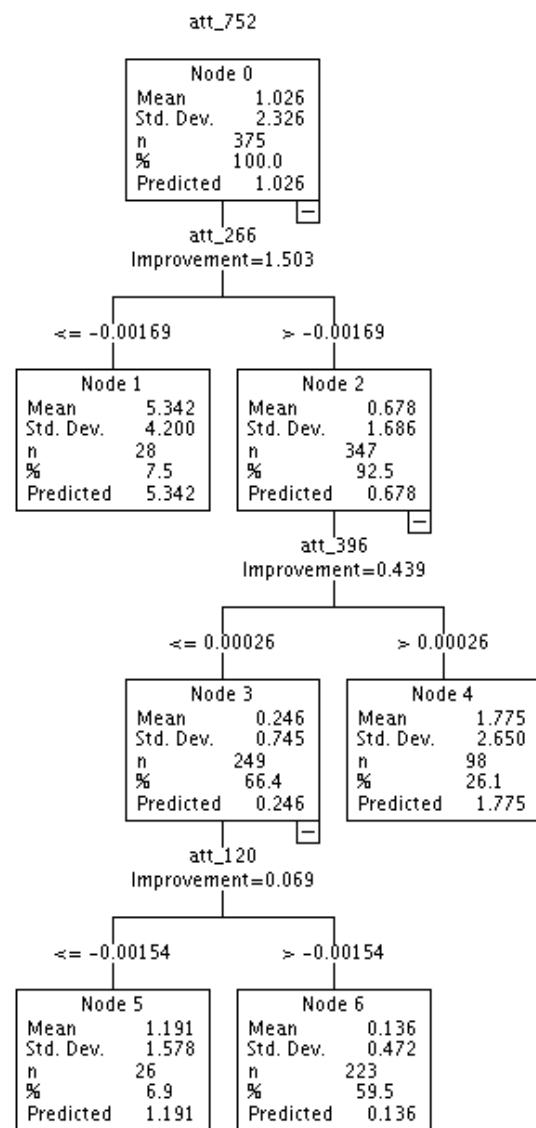

Fig 6-4 The decision tree analysis in modeling 4:1

# MDLs of different hyperspectral features on the six complete datasets:

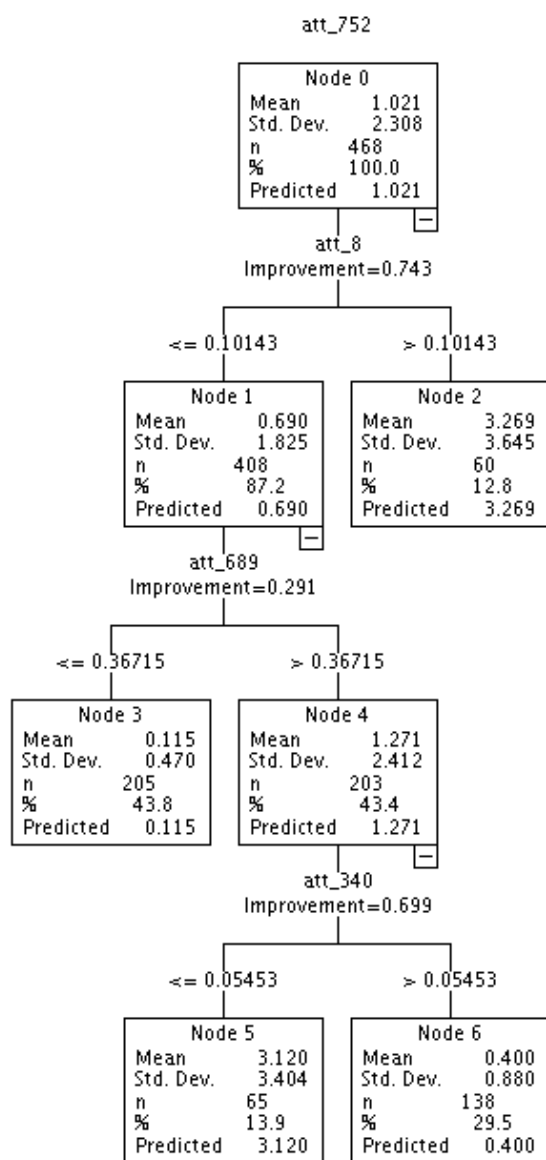

Fig 7-1 The decision tree analysis of R

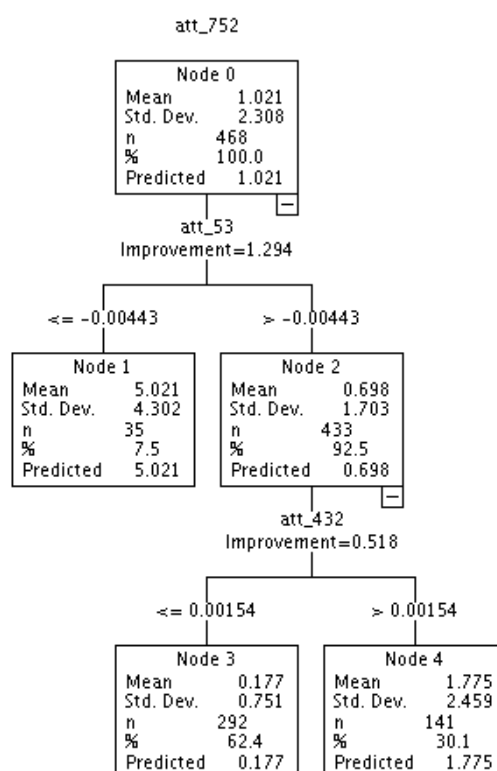

Fig 7-2 The decision tree analysis of R-dv1

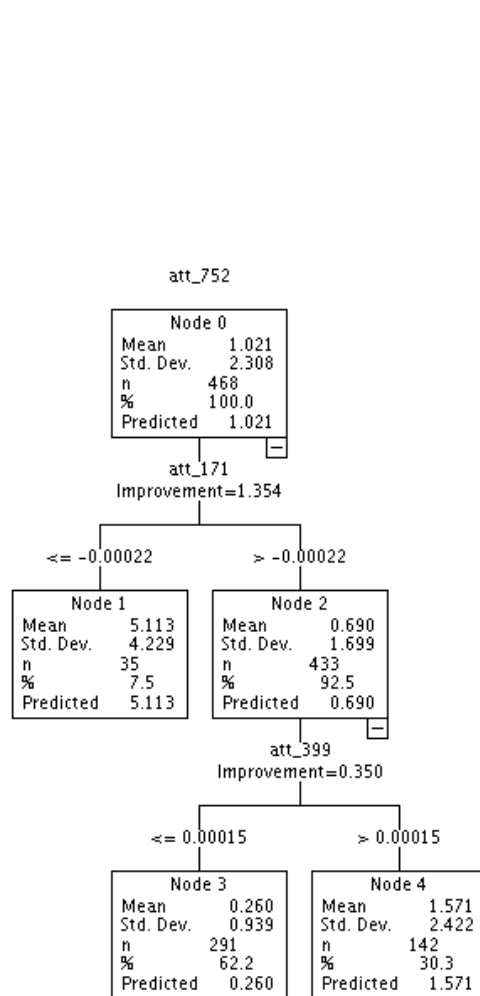

Fig 7-3 The decision tree analysis of R-dv2

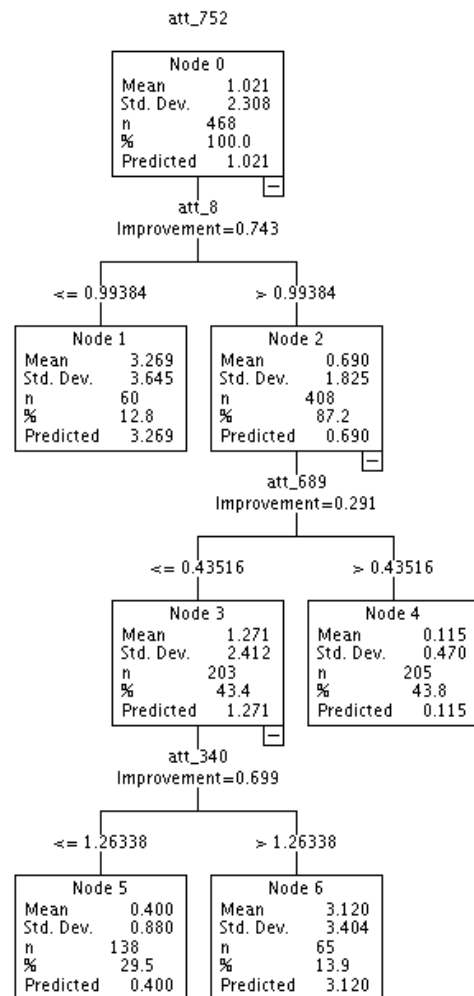

Fig 7-4 The decision tree analysis of R-abs

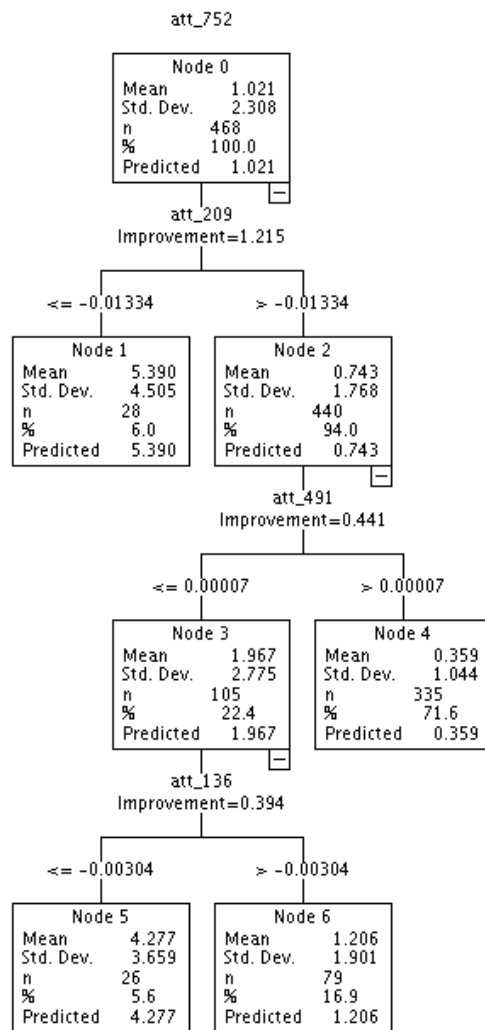

Fig 7-5 The decision tree analysis of R-abs-dv1

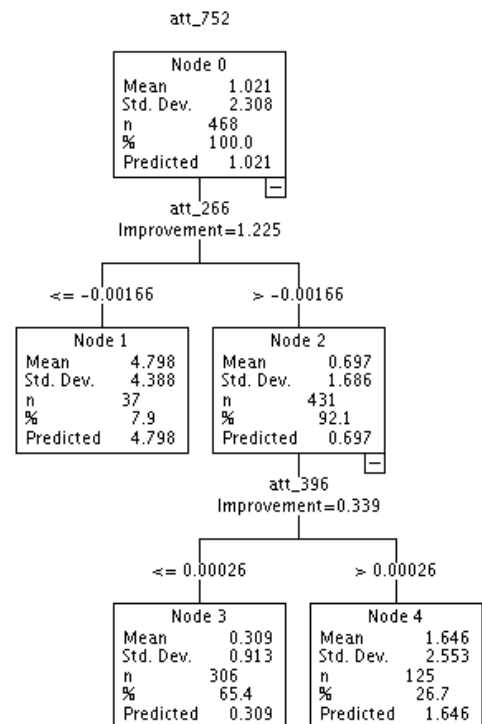

Fig 7-6The decision tree analysis of R-abs-dv2
